# Supplementary material for: Species boundaries in plant pathogenic fungi: a Colletotrichum case study
Source: PubMed Central journal article supplement (PMC4832473; doi:10.1186/s12862-016-0649-5), 2016-04-14

height of clusters

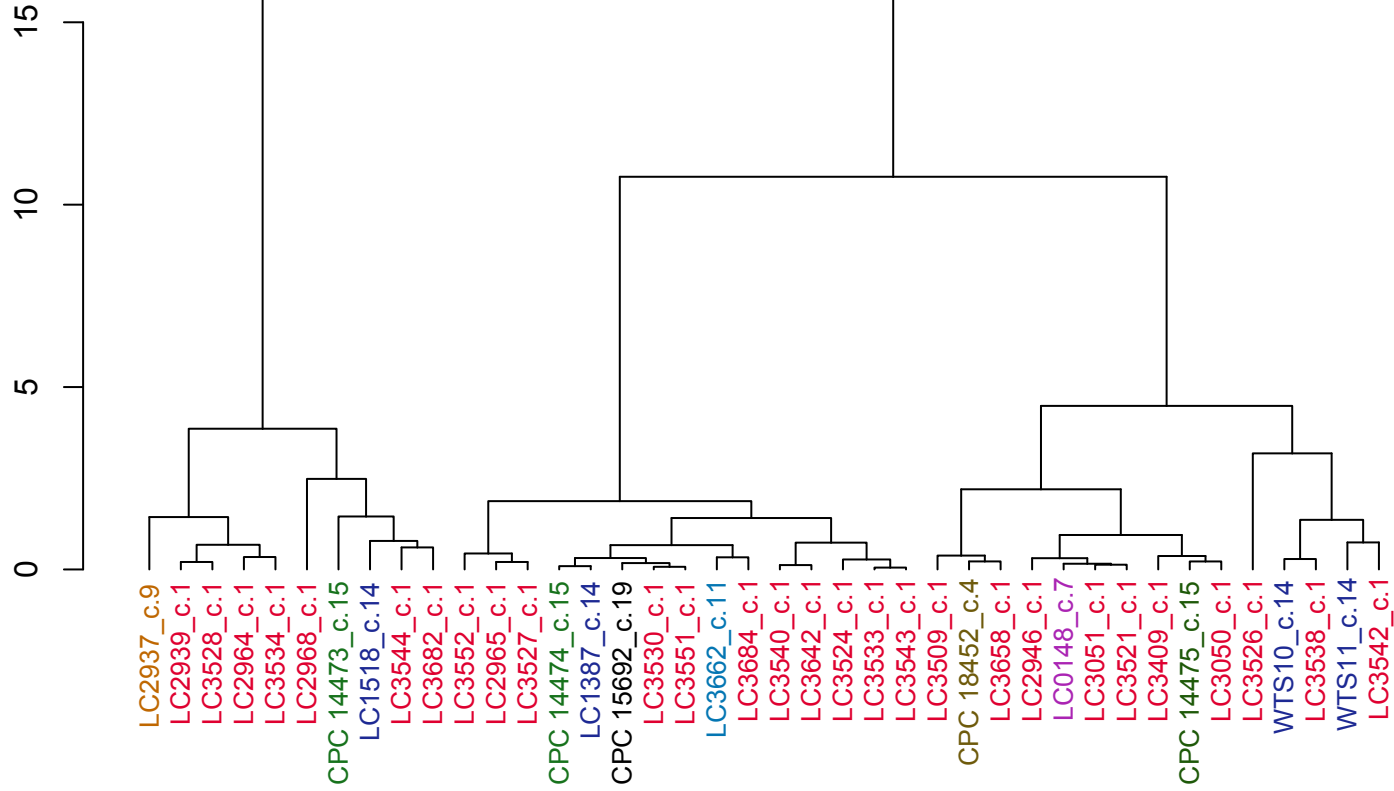

Supplement: 12862_2016_649_MOESM9_ESM.pdf [file 12862_2016_649_MOESM9_ESM.pdf]
